# Supplementary material for: Bayesian Parameter Inference by Markov Chain Monte Carlo with Hybrid Fitness Measures: Theory and Test in Apoptosis Signal Transduction Network
Source: PLoS One. 2013 Sep 27;8(9):e74178. doi: 10.1371/journal.pone.0074178 (PMC3785499; doi:10.1371/journal.pone.0074178)
Supplement: Text S1 — MCMC-HFM algorithm satisfies detailed balance condition. (DOC) [file pone.0074178.s018.doc]

**Text S1.MCMC-HFM algorithm satisfies detailed balance condition.**

MCMC-HFM algorithm satisfies detail balance condition as shown below.

*Proof*:

Denote the transition mechanism of the chain by.

We consider the case

Then,

The case the left of Eq > 1 is analogously proved. A posterior distribution satisfies detailed balance condition.
